# Supplementary material for: Inhibition of Bcl6b promotes gastric cancer by amplifying inflammation in mice
Source: PubMed Central journal article supplement (PMC6617686; doi:10.1186/s12964-019-0387-6), 2019-07-09
Supplement: 12964_2019_387_MOESM1_ESM.pdf [file 12964_2019_387_MOESM1_ESM.pdf]

**Figure S1**

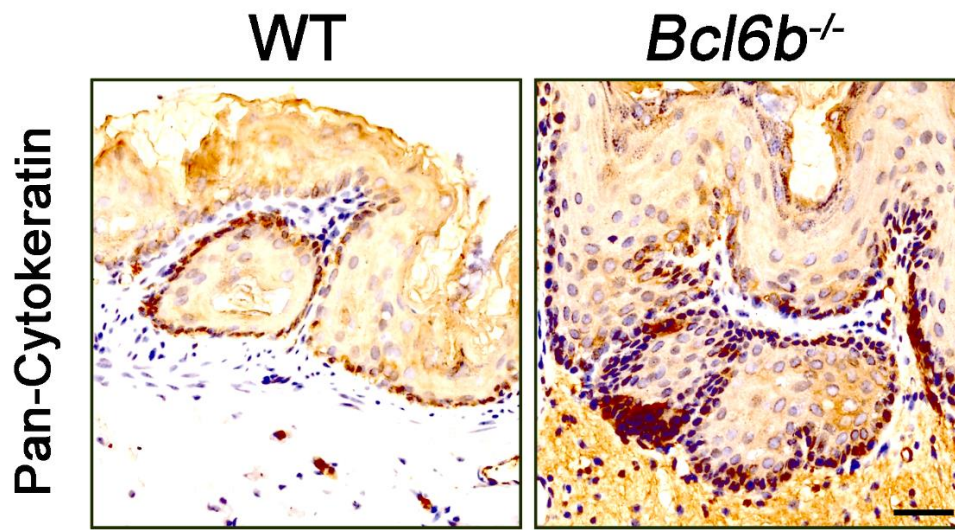

**Figure S1.** Representative images showing immunostaining of Pan-Cytokeratin expression (Scale bar, 50  $\mu$ m) from stomachs harbouring BaP-induced tumours (27 week) from *Bcl6b*<sup>-/-</sup> mice and WT controls.
