# Supplementary material for: Inhibition of Bcl6b promotes gastric cancer by amplifying inflammation in mice
Source: PubMed Central journal article supplement (PMC6617686; doi:10.1186/s12964-019-0387-6), 2019-07-09
Supplement: 12964_2019_387_MOESM2_ESM.pdf [file 12964_2019_387_MOESM2_ESM.pdf]

Figure S2

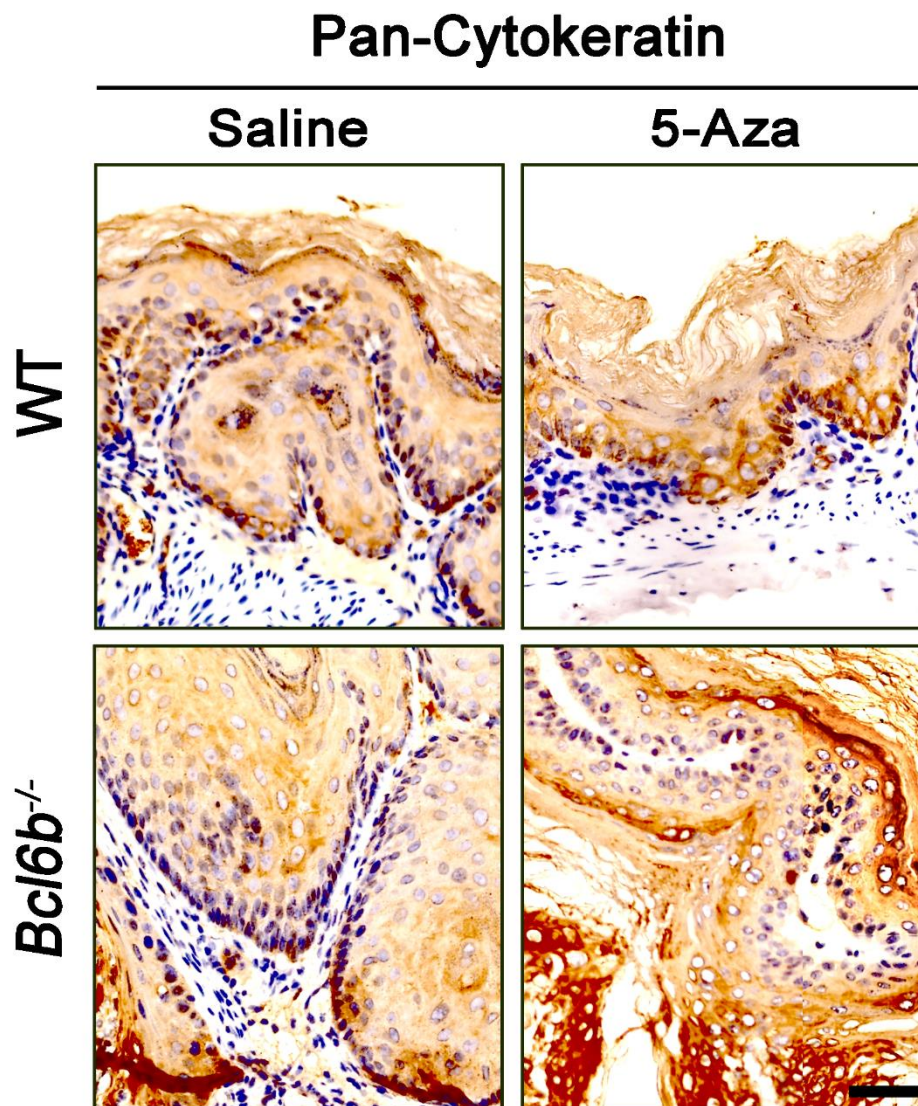

**Figure S2.** Representative images showing Pan-Cytokeratin immunostaining (Scale bar, 50  $\mu$ m) of stomachs harbouring BaP-induced tumours (25 week) from *Bcl6b*<sup>-/-</sup> mice and WT controls with or without 5-Aza treatment.
